# Supplementary material for: Aggression in Children with Conduct Problems and Callous-Unemotional Traits: Social Information Processing and Response to Peer Provocation
Source: Springer Nature journal article supplement (doi:10.1007/s10802-015-0027-6), 2015-05-04
Supplement: MOESM3 [file 542900]

Supplementary Table S3. *Correlations Among CRTT Variables: Proactive Aggression*

|  | 1 | 2 | 3 | 4 |
| --- | --- | --- | --- | --- |
| 1. Behavior | -- |  |  |  |
| 2. Affect | -.13 | -- |  |  |
| 3. Positive messages | -.29* | -.12 | -- |  |
| 4. Negative messages | .30* | .25* | -.14 | -- |

*Notes.* Correlations include data from both Instrumental and Hostile conditions. 1 = Behavior, 2 = Affect, 3 = Positive messages, 4 = Negative messages.

**p* < .05
