# Supplementary material for: Aggression in Children with Conduct Problems and Callous-Unemotional Traits: Social Information Processing and Response to Peer Provocation
Source: Springer Nature journal article supplement (doi:10.1007/s10802-015-0027-6), 2015-05-04
Supplement: MOESM4 [file 542900]

Supplementary Table S4. *Correlations Among CRTT Variables: Reactive Aggression*

|  | **1** | **2** | **3** | **4** | **5** | **6** | **7** | **8** | **9** | **10** | **11** | **12** | **13** | **14** | **15** |
| --- | --- | --- | --- | --- | --- | --- | --- | --- | --- | --- | --- | --- | --- | --- | --- |
| **Behavior** |  |  |  |  |  |  |  |  |  |  |  |  |  |  |  |
| 1. Low, Instrumental | -- |  |  |  |  |  |  |  |  |  |  |  |  |  |  |
| 2. Low, Hostile | .45* | -- |  |  |  |  |  |  |  |  |  |  |  |  |  |
| 3. High, Instrumental | .39* | .32* | -- |  |  |  |  |  |  |  |  |  |  |  |  |
| 4. High, Hostile | .15 | .26 | .09 | -- |  |  |  |  |  |  |  |  |  |  |  |
| **Affect** |  |  |  |  |  |  |  |  |  |  |  |  |  |  |  |
| 5. Low, Instrumental | -.24 | -.01 | -.09 | .05 | -- |  |  |  |  |  |  |  |  |  |  |
| 6. Low, Hostile | -.12 | -.01 | .06 | .06 | .51* | -- |  |  |  |  |  |  |  |  |  |
| 7. High, Instrumental | -.25 | .01 | -.07 | -.12 | .57* | .46* | -- |  |  |  |  |  |  |  |  |
| 8. High, Hostile | -.10 | .20 | .17 | -.11 | .38* | .57* | .59* | -- |  |  |  |  |  |  |  |
| **Prosocial Messages** |  |  |  |  |  |  |  |  |  |  |  |  |  |  |  |
| 9. Low, Instrumental | -.31* | -.36* | .08 | -.07 | .19 | .33* | .14 | .14 | -- |  |  |  |  |  |  |
| 10. Low, Hostile | -.34* | -.36* | .00 | -.08 | .29* | .36* | .05 | .06 | .58* | -- |  |  |  |  |  |
| 11. High, Instrumental | -.08 | -.22 | .07 | -.25 | .22 | .26 | .30* | .17 | .61* | .34* | -- |  |  |  |  |
| 12. High, Hostile | .19 | -.16 | .16 | -.17 | .15 | .10 | .20 | .12 | .29* | .35* | .36* | -- |  |  |  |
| **Antisocial Messages** |  |  |  |  |  |  |  |  |  |  |  |  |  |  |  |
| 13. Low, Instrumental | .26 | .17 | .14 | .19 | -.37* | .05 | -.29* | -.09 | .01 | -.14 | -.11 | -.10 | -- |  |  |
| 14. Low, Hostile | .26 | .27* | .17 | .16 | -.08 | -.10 | -.35* | -.03 | .00 | -.13 | -.11 | -.10 | .44* | -- |  |
| 15. High, Instrumental | .16 | .02 | .09 | .19 | -.35* | -.04 | -.40* | -.14 | .02 | .03 | -.02 | .18 | .48* | .41* | -- |
| 16. High, Hostile | .17 | .00 | .14 | .24 | -.18 | -.06 | -.43* | -.24 | .10 | .17 | -.03 | .03 | .31* | .56* | .51* |

*Notes.* Low and High refer to the level of provocation on a given trial; Instrumental and Hostile refer to the condition of the task. 1 = Behavior—Low, Instrumental; 2 = Behavior—Low, Hostile; 3 = Behavior—High, Instrumental; 4 = Behavior—High, Hostile; 5 = Affect—Low, Instrumental; 6 = Affect—Low, Hostile; 7 = Affect—High, Instrumental; 8 = Affect—High, Hostile; 9 = Prosocial Messages—Low, Instrumental; 10 = Prosocial Messages—Low, Hostile; 11 = Prosocial Messages—High, Instrumental; 12 = Prosocial Messages—High, Hostile; 13 = Antisocial Messages—Low, Instrumental; 14 = Antisocial Messages—Low, Hostile; 15 = Antisocial Messages—High, Instrumental; 16 = Antisocial Messages—High, Hostile.

**p* < .05
