# Supplementary material for: Aggression in Children with Conduct Problems and Callous-Unemotional Traits: Social Information Processing and Response to Peer Provocation
Source: Springer Nature journal article supplement (doi:10.1007/s10802-015-0027-6), 2015-05-04
Supplement: MOESM5 [file 542900]

Supplementary Table S5. *Correlations Among CRTT Variables: Dissipation of Aggression in Response to Final High Provocation*

|  | **1** | **2** | **3** | **4** | **5** | **6** | **7** | **8** | **9** | **10** | **11** | **12** | **13** | **14** | **15** | **16** | **17** | **18** | **19** | **20** | **21** | **22** | **23** |
| --- | --- | --- | --- | --- | --- | --- | --- | --- | --- | --- | --- | --- | --- | --- | --- | --- | --- | --- | --- | --- | --- | --- | --- |
| **Behavior** |  |  |  |  |  |  |  |  |  |  |  |  |  |  |  |  |  |  |  |  |  |  |  |
| *Instrumental* |  |  |  |  |  |  |  |  |  |  |  |  |  |  |  |  |  |  |  |  |  |  |  |
| 1. First | -- |  |  |  |  |  |  |  |  |  |  |  |  |  |  |  |  |  |  |  |  |  |  |
| 2. Middle | .74* | -- |  |  |  |  |  |  |  |  |  |  |  |  |  |  |  |  |  |  |  |  |  |
| 3. Last | .68* | .70* | -- |  |  |  |  |  |  |  |  |  |  |  |  |  |  |  |  |  |  |  |  |
| *Hostile* |  |  |  |  |  |  |  |  |  |  |  |  |  |  |  |  |  |  |  |  |  |  |  |
| 4. First | .08 | .24 | .22 | -- |  |  |  |  |  |  |  |  |  |  |  |  |  |  |  |  |  |  |  |
| 5. Middle | .18 | .46* | .32* | .63* | -- |  |  |  |  |  |  |  |  |  |  |  |  |  |  |  |  |  |  |
| 6. Last | .19 | .39* | .44* | .52* | .62* | -- |  |  |  |  |  |  |  |  |  |  |  |  |  |  |  |  |  |
| **Affect** |  |  |  |  |  |  |  |  |  |  |  |  |  |  |  |  |  |  |  |  |  |  |  |
| *Instrumental* |  |  |  |  |  |  |  |  |  |  |  |  |  |  |  |  |  |  |  |  |  |  |  |
| 7. First | .00 | .02 | -.04 | .22 | .30* | .01 | -- |  |  |  |  |  |  |  |  |  |  |  |  |  |  |  |  |
| 8. Middle | .04 | .06 | .02 | .06 | .01 | .03 | .23 | -- |  |  |  |  |  |  |  |  |  |  |  |  |  |  |  |
| 9. Last | -.08 | -.07 | -.10 | -.16 | -.10 | -.13 | .20 | .75* | -- |  |  |  |  |  |  |  |  |  |  |  |  |  |  |
| *Hostile* |  |  |  |  |  |  |  |  |  |  |  |  |  |  |  |  |  |  |  |  |  |  |  |
| 10. First | .05 | -.11 | -.02 | .06 | .07 | .11 | .18 | .09 | .02 | -- |  |  |  |  |  |  |  |  |  |  |  |  |  |
| 11. Middle | -.07 | -.05 | -.04 | .26 | .21 | .13 | .24 | .14 | .07 | .31* | -- |  |  |  |  |  |  |  |  |  |  |  |  |
| 12. Last | -.10 | .02 | .04 | .45* | .32* | .32* | .20 | .35* | .12 | .26 | .65* | -- |  |  |  |  |  |  |  |  |  |  |  |
| **Prosocial Messages** |  |  |  |  |  |  |  |  |  |  |  |  |  |  |  |  |  |  |  |  |  |  |  |
| *Instrumental* |  |  |  |  |  |  |  |  |  |  |  |  |  |  |  |  |  |  |  |  |  |  |  |
| 13. First | -.47* | -.26 | -.28* | -.02 | -.04 | -.05 | .19 | -.11 | .02 | -.03 | .08 | .05 | -- |  |  |  |  |  |  |  |  |  |  |
| 14. Middle | -.21 | -.12 | -.14 | .03 | .05 | .00 | .09 | .02 | .02 | -.14 | .09 | .08 | .34* | -- |  |  |  |  |  |  |  |  |  |
| 15. Last | -.14 | -.12 | -.05 | .13 | .13 | .15 | .15 | .09 | .10 | -.07 | .13 | .09 | .41* | .75* | -- |  |  |  |  |  |  |  |  |
| *Hostile* |  |  |  |  |  |  |  |  |  |  |  |  |  |  |  |  |  |  |  |  |  |  |  |
| 16. First | .02 | -.02 | .02 | .02 | -.09 | -.05 | .16 | .11 | .20 | .21 | .12 | .11 | .11 | -.06 | .05 | -- |  |  |  |  |  |  |  |
| 17. Middle | .00 | -.04 | .00 | .06 | .02 | .08 | .05 | .11 | .21* | .13 | .20 | .11 | .14 | .52* | .61* | .57* | -- |  |  |  |  |  |  |
| 18. Last | -.06 | -.14 | -.08 | .00 | -.05 | .01 | -.07 | .19 | .28* | .10 | .24 | .16 | .06 | .48* | .54* | .39* | .84* | -- |  |  |  |  |  |
| **Antisocial Messages** |  |  |  |  |  |  |  |  |  |  |  |  |  |  |  |  |  |  |  |  |  |  |  |
| *Instrumental* |  |  |  |  |  |  |  |  |  |  |  |  |  |  |  |  |  |  |  |  |  |  |  |
| 19. First | .07 | -.08 | -.02 | -.09 | -.15 | .13 | -.41* | -.01 | -.01 | -.04 | -.11 | -.11 | -.14 | -.15 | -.14 | -.12 | -.13 | -.11 | -- |  |  |  |  |
| 20. Middle | .05 | -.16 | -.11 | .06 | -.12 | .03 | -.26 | -.03 | -.18 | -.08 | .11 | .14 | -.10 | -.05 | -.10 | -.09 | -.09 | -.12 | .52* | -- |  |  |  |
| 21. Last | .11 | -.03 | .05 | .02 | .14 | .12 | -.28* | .06 | .04 | .01 | .03 | .11 | -.09 | -.10 | -.09 | -.08 | -.08 | -.11 | .62* | .55* | -- |  |  |
| *Hostile* |  |  |  |  |  |  |  |  |  |  |  |  |  |  |  |  |  |  |  |  |  |  |  |
| 22. First | .32* | .26 | .24 | .00 | .01 | -.03 | -.16 | -.05 | -.12 | -.05 | .04 | -.10 | -.09 | .02 | .02 | -.06 | .09 | .15 | .32 | .19 | .29* | -- |  |
| 23. Middle | .22 | .14 | .11 | .09 | .10 | .05 | -.08 | .16 | -.06 | -.06 | .14 | .15 | -.13 | -.08 | -.13 | -.11 | -.11 | .00 | .43* | .35* | .39* | .53* | -- |
| 24. Last | .03 | -.06 | -.01 | .14 | -.02 | .26 | -.15 | -.06 | -.11 | -.02 | .15 | .19 | -.10 | -.11 | -.10 | -.09 | -.09 | -.13 | .34* | .51* | .61* | .29* | .50* |

*Note.* First, Middle, and last refer to the five trials immediately following the final instance of provocation; Instrumental and Hostile refer to the condition of the task. 1 = Behavior—Instrumental, First; 2 = Behavior—Instrumental, Middle; 3 = Behavior—Instrumental, Last; 4 = Behavior—Hostile, First; 5 = Behavior—Hostile, Middle; 6 = Behavior—Hostile, Last; 7 = Affect—Instrumental, First; 8 = Affect—Instrumental, Middle; 9 = Affect—Instrumental, Last; 10 = Affect—Hostile, First; 11 = Affect—Hostile, Middle; 12 = Affect—Hostile, Last; 13 = Prosocial Messages—Instrumental, First; 14 = Prosocial Messages—Instrumental, Middle; 15 = Prosocial Messages—Instrumental, Last; 16 = Prosocial Messages—Hostile, First; 17 = Prosocial Messages—Hostile, Middle; 18 = Prosocial Messages—Hostile, Last; 19 = Antisocial Messages—Instrumental, First; 20 = Antisocial Messages—Instrumental, Middle; 21 = Antisocial Messages—Instrumental, Last; 22 = Antisocial Messages—Hostile, First; 23 = Antisocial Messages—Hostile, Middle; 24 = Antisocial Messages—Hostile, Last.

**p* < .05
